# Supplementary material for: Effects of Epigallocatechin-3-Gallate on Autophagic Lipolysis in Adipocytes
Source: MDPI journal article supplement (doi:10.3390/nu9070680), 2017-06-30
Supplement: s1 [file s1]

## Supplemental information

### Article

# Effects of epigallocatechin-3-gallate on autophagic lipolysis in adipocytes

Sang-Nam Kim <sup>1#</sup>, Hyun-Jung Kwon <sup>1#</sup>, Seun Akindehin<sup>1</sup>, Hyun Woo Jeong, and Yun-Hee Lee <sup>1,\*</sup>

<sup>1</sup> College of Pharmacy, Yonsei Institute of Pharmaceutical Sciences, Yonsei University, Incheon, Korea; sangnamik@nate.com (S.N.K.); junek0603@gmail.com (H.J.K.); akindehin@gmail.com (S.A.)

<sup>2</sup> Vital Beauty Division, Amorepacific R&D Center, 314-1 Bora-dong, Giheung-gu, Yongin-si, Gyeonggi-do: misterjay@amorepacific.com

\* Correspondence: yunhee.lee@yonsei.ac.kr; Tel.: +82-32-749-4522

#These authors contributed equally to this work

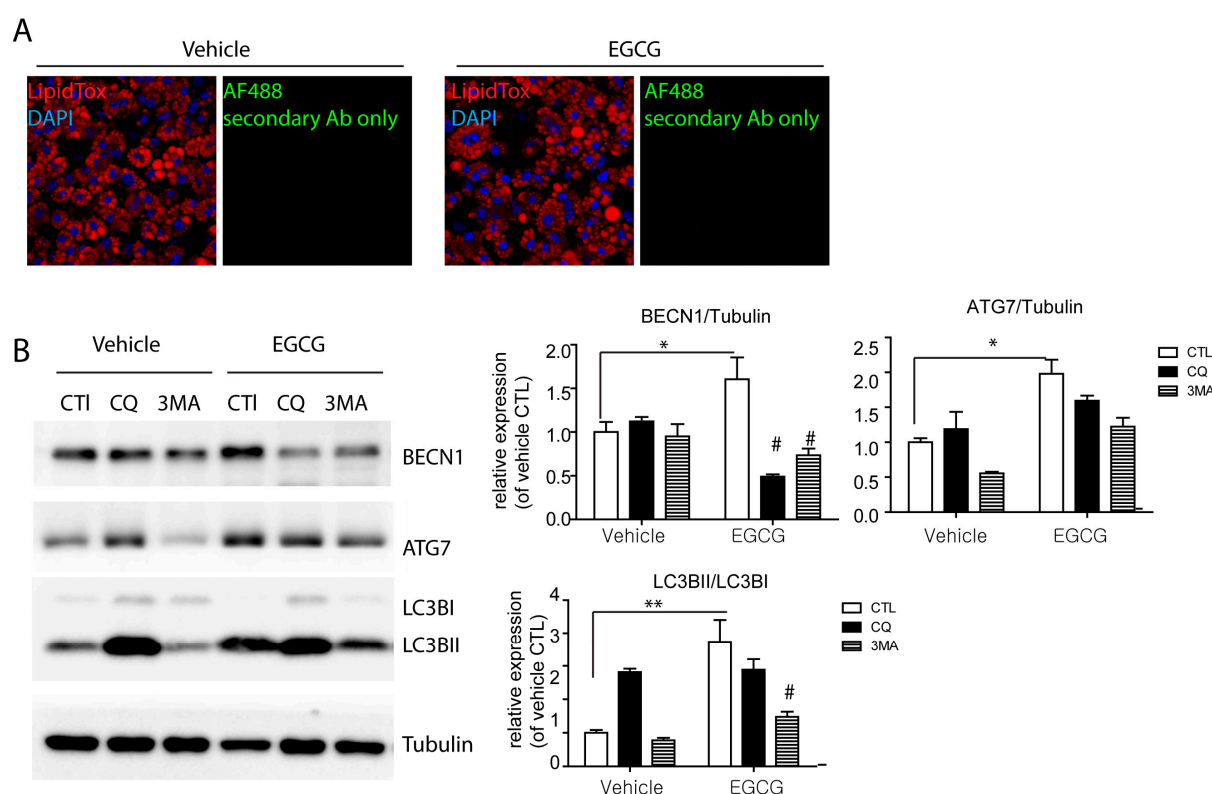

**Figure S1. Effects of EGCG on autophagy responses in adipocytes (related to Figure 4).**

A. Representative images of negative controls used for RAB7 and LC3B detection. The negative controls were incubated with a secondary antibody conjugated with Alexa Flour 488 without primary antibody incubation

B. Western blot analysis of beclin1, ATG7, and LC3B expression in adipocytes treated with vehicle or EGCG for 8 hr. Autophagy inhibitors (chloroquine (CQ), and 3-MA) were pretreated 30 min before EGCG or vehicle treatment. (n = 3 per condition, \* $p < 0.05$ , \*\* $p < 0.01$  compared to Vehicle control, # $p < 0.05$  compared to EGCG controls)
